# Supplementary material for: Sequential enolboration/hydroformylation/aldol addition: a new one-pot cascade reaction for the regio- and diastereoselective formation of carbocyclic quaternary centres from acyclic olefins
Source: Royal Society of Chemistry journal article supplement (doi:10.1039/b405120c), 2004-01-01

## Sequential enolboration/hydroformylation/aldol addition: a new one-pot cascade reaction for the regio- and diastereoselective formation of carbocyclic quaternary centres from acyclic olefins

Mark D. Keränen and Peter Eilbracht

*Fachbereich Chemie, Organische Chemie I, Universität Dortmund, Otto-Hahn-Str. 6, D-44227 Dortmund, Germany*

### Supporting information & experimental data

**General Methods.** All air-sensitive reactions were performed under an argon atmosphere using distilled solvents where required. Triethylamine (Et<sub>3</sub>N) was distilled from calcium hydride (CaH<sub>2</sub>). All other reagents were commercially purchased and used without further purification. NMR spectra were measured using CDCl<sub>3</sub> as the solvent and internal standard. Hydroformylation/aldol addition reactions were carried out in autoclaves - 250 mL PTFE insert or 70 mL stainless steel - with specially designed heating and stirring mantles.

### Dimethyl 2-allyl-malonate (**3**)

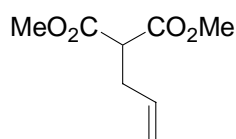

To a suspension of 60 % NaH (11 g, 280 mmol) in 200 mL dry THF was added dropwise dimethyl malonate (33.0 g, 250 mmol). After addition was complete, the mixture was stirred for 15 min at RT before allyl bromide (30.25 g, 250 mmol) was added dropwise. After 2 h, the mixture was quenched by the slow addition of water, extracted with ether and washed with brine before being dried, concentrated and purified by flash chromatography (15:1 hexane/Et<sub>2</sub>O) to give **3**

(37.1g, 215 mmol) in 86 % as a colourless oil. All spectra matched those reported in the literature.<sup>1</sup>

#### Methyl 2-acetyl-pent-4-enoate (4)

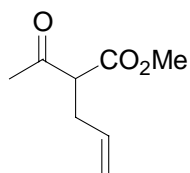

To a suspension of 60 % NaH (625 mg, 26 mmol) in 75 mL dry THF at 0 °C was added via syringe methyl 3-oxo-butyrate (2.3 g, 19.8 mmol). When addition was complete, the mixture was stirred for 15 min at 0 °C before allyl bromide (2.94 g, 24 mmol) was added dropwise. After 2 h, the mixture was quenched by the slow addition of sat. aq. NH<sub>4</sub>Cl, extracted with ether and washed with brine before being dried, concentrated and purified by Kugelrohr distillation (70 °C @ 1 mbar) to give **4** (2.0 g, 12.9 mmol) in 65 % as a nearly colourless oil. All spectra matched those reported in the literature.<sup>2</sup>

#### Ethyl 2,4,4-trimethyl-3-oxo-hex-5-enoate (5)

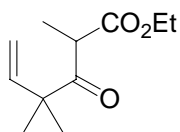

**(A)** A mixture of zinc dust (19.6 g, 0.3 mol), AlCl<sub>3</sub> (4 g, 30 mmol) and ethyl cyano acetate (10.6 mL, 90 mmol) was stirred in 200 mL of dry THF at 0 °C. After 15 minutes, a solution of prenyl bromide (11.53 mL, 0.1 mol) in 15 mL THF was added dropwise. After addition was complete, the reaction was left to warm to RT and was stirred overnight, after which 200 mL of 2 N HCl was added to the

(1) Ma, S.; Xu, B.; Ni, B. *J. Org. Chem.* **2000**, *65*, 8532.

(2) Welch, S. C.; Assercq, J. M.; Loh, J. P.; Glase, S. A. *J. Org. Chem.* **1987**, *52*, 1440.

reaction mixture, and stirring was continued for another 15 min. The reaction was filtered and washed with sat. aq.  $\text{NaHCO}_3$  (3 x 100 mL) and brine (1 x 100 mL) before being dried, concentrated and purified by column chromatography (5:1  $\text{CH}_2\text{Cl}_2$ /hexane) to give 11.2 g (61 %) of ethyl 4,4-dimethyl-3-oxo-hex-5-enoate as a pale-yellow oil. All spectra matched those reported in the literature.<sup>3</sup>

**(B)** To a stirring mixture of ethyl 4,4-dimethyl-3-oxo-hex-5-enoate (1.0 g, 5.4 mmol) and methyl iodide (0.3 mL, 5.4 mmol) in 20 mL of acetone at RT was added at once 0.75 g (5.4 mmol)  $\text{K}_2\text{CO}_3$  and the mixture was stirred overnight. The mixture was then extracted with ether and washed with sat. aq.  $\text{NaHCO}_3$  solution before being dried and concentrated to give the methylated ketoester **5** (0.92 g, 4.6 mmol) in 85 % (52 % over both steps) as a yellow oil which required no further purification.  **$^1\text{H-NMR}$**  (500 MHz,  $\text{CDCl}_3$ )  $\delta$  1.20 (m, 6H,  $2\times\text{CH}_3$ ); 1.26 (m, 6H,  $2\times\text{CH}_3$ ); 3.89 (q,  $J = 6$  Hz, 1H,  $\text{RC}(\text{O})\text{C}(\text{H})\text{CO}_2\text{Et}$ ); 4.09 (q,  $J = 6$  Hz, 2H,  $\text{ROCH}_2\text{CH}_3$ ); 5.21 (dd,  $J = 10, 20$  Hz, 2H,  $\text{H}_2\text{C}=\text{CHR}$ ); 5.81 (dd,  $J = 10, 20$  Hz, 1H,  $\text{H}_2\text{C}=\text{CHR}$ ).  **$^{13}\text{C-NMR}$**  (125 MHz,  $\text{CDCl}_3$ )  $\delta$  13.9 ( $\alpha\text{-CH}_3$ ), 14.8 ( $\text{RCO}_2\text{CH}_2\text{Me}$ ), 23.3 ( $2\times\text{Gem-CH}_3$ ), 46.8 ( $\text{C}_q$ ), 51.8 ( $\text{R}_2\text{CHCH}_3$ ), 61.1 ( $\text{RCO}_2\text{CH}_2\text{Me}$ ), 115.3 ( $\text{C}=\text{C}$ ), 141.4 ( $\text{C}=\text{C}$ ), 170.6 ( $\text{CO}_2\text{Et}$ ), 208.6 ( $\text{C}=\text{O}$ ). **FTIR** ( $\text{CDCl}_3$  film): 2977, 1751, 1685, 1249, 910, 743  $\text{cm}^{-1}$ . **HR-EIMS** anal. calc. for  $\text{C}_{11}\text{H}_{19}\text{O}_3$  [ $\text{M} + \text{H}$ ] $^+$ : 199.1334; anal. found: 199.1359

### Methyl 2-methyl-3-oxo-hept-6-enoate (**6**)

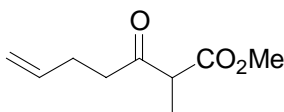

**(A)** To a stirring mixture of 1.2 g (50 mmol) NaH in 100 mL dry THF cooled to 0 °C was added 3.48 g (30 mmol) methyl 3-oxo-butyrate via syringe. When addition was complete, the mixture was stirred for 30 min at 0 °C before 11.7 mL

(3) Hiyashi, Y.; Orikasa, S.; Tanaka, K.; Kano, K.; Kiso, Y. *J. Org. Chem.* **2000**, *65*, 8402.

of *n*-BuLi (2.5 M in hexane) was added over 10 min via syringe. The mixture was stirred for another 10 min before allyl bromide (3.99 g, 33 mmol) was added and the mixture was allowed to warm to RT while stirring (approx. 15 min). The reaction was then quenched via the slow addition of sat. aq. NH<sub>4</sub>Cl (100 mL), extracted with ether and washed with brine before being dried, concentrated and purified by Kugelrohr distillation to give methyl 3-oxo-hept-6-enoate (3.9 g, 25.0 mmol) in 85 % yield as a pungent, light-yellow oil which was immediately taken on to the subsequent reaction without purification.

**(B)** To a stirring RT acetone solution (20 mL) of methyl 3-oxo-hept-6-enoate (3.9 g, 25.0 mmol), methyl iodide (0.40 mL, 6.4 mmol) and 885 mg (6.4 mmol) K<sub>2</sub>CO<sub>3</sub> were added at once and the mixture was stirred overnight. The mixture was then extracted with ether and washed with brine before being dried and concentrated to give the methylated ketoester **6** in 89 % (76 % over both steps) as a yellow oil which required no further purification. All spectra matched those reported in the literature.<sup>4</sup>

#### **Procedure for enolboration/hydroformylation/aldol addition (Method A)**

Et<sub>3</sub>N (1.05 eq. to carbonyl compound) was pre-complexed under an argon atmosphere with (*cy*-hex)<sub>2</sub>BCl (1.05 eq.) in dry CH<sub>2</sub>Cl<sub>2</sub> (5 mL) at 0 °C for 15 min. The unsaturated carbonyl compound in approx. 1 mL of solvent was then added slowly via syringe and the enolboration was allowed to stir for an additional 30 min. The mixture was simply transferred into the autoclave containing 0.9 mol % Rh(CO)<sub>2</sub>(acac), 10-15 mL of solvent and 1.8 mol % XANTPHOS ligand. The autoclave was then pressurized to 60 bar with equal pressures of CO and H<sub>2</sub> **!!!CAUTION! DEADLY GAS!!!** and heated overnight to 80 °C. Upon cooling the autoclave to RT, the reaction mixture was removed and concentrated under reduced pressure. Enough MeOH was added to dissolve the solid residue (~25 mL) along with 2 mL of conc. pH 7 phosphate buffer and 1 mL of 30 % H<sub>2</sub>O<sub>2</sub>, and the reaction was allowed to stir overnight before being extracted with

---

(4) Stork, G.; Winkler, J. D.; Saccomano, N. A. *Tetrahedron Lett.* **1983**, *24*, 465.

ether (100 mL), washed with sat. aq.  $\text{NaHCO}_3$  (1x75 mL), dried and concentrated prior to further purification when necessary via flash chromatography or Kugelrohr distillation.

### Dimethyl 2-hydroxy-cyclopentane-1,1-dicarboxylate (**7**) via Method A

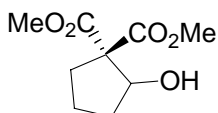

The reaction was performed according to **method A** with 500 mg (2.9 mmol) **3** using 6 mg (0.9 mol %)  $\text{Rh}(\text{CO})_2(\text{acac})$  catalyst and 24 mg (1.8 mol %) XANTPHOS, with the autoclave being subjected to a pressure of 60 bar (30:30)  $\text{CO}/\text{H}_2$  and temperature of 80 °C for 18 h. Buffered oxidative workup as described above resulted in a 51 % yield of **7** (294 mg, 1.45 mmol) as a pale-yellow oil requiring no further purification. **Anal. Calc.** for  $\text{C}_9\text{H}_{14}\text{O}_5$ : C: 53.5 %; H 7.0 %. Anal found: C: 53.6 %; H: 7.0 %.  **$^1\text{H-NMR}$**  (400 MHz,  $\text{CDCl}_3$ )  $\delta$  1.64 (m, 2H,  $\text{CH}_2\text{R}(\text{CH}_2)\text{CH}_2\text{R}$ ); 1.85 (m, 1H,  $\text{CH}_2\text{R}(\text{CHH})\text{CHC}_q(\text{OH})$ ); 2.05 (m, 1H,  $\text{CH}_2\text{R}(\text{CHH})\text{CH}(\text{OH})\text{R}$ ); 2.27 (m, 2H,  $\text{C}_q(\text{CH}_2)\text{CH}_2\text{R}$ ); 3.64 (s, 3H,  $\text{CO}_2\text{CH}_3$ ); 3.66 (s, 3H,  $\text{CO}_2\text{CH}_3$ ); 4.53 (t,  $J = 5$  Hz, 1H,  $\text{C}_q\text{C}(\text{H})(\text{OH})\text{CH}_2\text{R}$ ).  **$^{13}\text{C-NMR}$**  (100 MHz,  $\text{CDCl}_3$ )  $\delta$  20.0 ( $\text{CH}_2$ ), 30.8 ( $\text{CH}_2$ ), 32.6 ( $\text{CH}_2$ ), 48.9 ( $\text{CO}_2\text{Me}$ ), 52.5 ( $\text{CO}_2\text{Me}$ ), 64.7 ( $\text{C}_q$ ), 77.2 ( $\text{R}_2\text{CHOH}$ ), 169.3 ( $\text{C}_q\text{CO}_2\text{Me}$ ), 171.0 ( $\text{C}_q\text{CO}_2\text{Me}$ ). **FTIR** (neat): 3501 (broad), 2952, 2856, 1731, 1436, 1274, 1091. **HR-FABMS** anal. calc. for  $\text{C}_9\text{H}_{15}\text{O}_5$   $[\text{M} + \text{H}]^+$ : 203.0920; anal. found: 203.0910.

### Methyl 1-acetyl-2-hydroxy-cyclopentanecarboxylate (**8**) via Method A

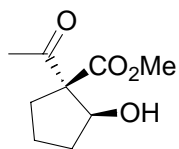

The reaction was performed according to **method A** with 250 mg (1.6 mmol) of **4** using 4 mg (0.9 mol %) Rh(CO)<sub>2</sub>(acac) catalyst and 16 mg (1.8 mol %) XANTPHOS, with the autoclave being subjected to a pressure of 60 bar (30:30) CO/H<sub>2</sub> and temperature of 80 °C for 16 h. Buffered oxidative workup as described above resulted in a 50 % yield of **8** (150 mg, 0.8 mmol) as the sole product in a 1.6:1 ratio of diastereoisomers as a fragrant, volatile yellow oil requiring no further purification. **<sup>1</sup>H-NMR** (400 MHz, CDCl<sub>3</sub>) Major diastereoisomer: δ 1.45-1.92 (m, 4H, RCH<sub>2</sub>CH<sub>2</sub>CH(OH)R); 2.02 (m, 2H, C<sub>q</sub>(CH<sub>2</sub>)CH<sub>2</sub>R); 2.15 (s, 3H, Ac); 3.69 (s, 3H, C<sub>q</sub>CO<sub>2</sub>CH<sub>3</sub>) 4.65 (t, *J* = 8 Hz, 1H, C<sub>q</sub>C(H)(OH)CH<sub>2</sub>R). Minor diastereoisomer: δ 2.13 (s, 3H, Ac); 3.72 (s, 3H, C<sub>q</sub>CO<sub>2</sub>CH<sub>3</sub>); 4.51 (t, *J* = 6 Hz, 1H, C<sub>q</sub>C(H)(OH)CH<sub>2</sub>R). **<sup>13</sup>C-NMR** (100 MHz, CDCl<sub>3</sub>) Major diastereoisomer: δ 24.0 (CH<sub>2</sub>), 25.3 (CH<sub>2</sub>), 28.5 (Ac), 38.3 (CH<sub>2</sub>), 52.5 (CO<sub>2</sub>Me), 66.5 (C<sub>q</sub>), 76.3 (CHOH), 173.6 (CO<sub>2</sub>Me), 200.2 (C=O). Minor diastereoisomer: δ 26.2 (Ac), 52.7 (CO<sub>2</sub>Me), 77.4 (R<sub>2</sub>CHOH). **FTIR** (neat): 3411 (broad), 2933, 2856, 1720, 1711, 1258, 1063, 733. **HR-FABMS** anal. calc. for C<sub>9</sub>H<sub>15</sub>O<sub>4</sub> [M + H]<sup>+</sup>: 187.0970; anal. found: 187.0950

### Ethyl 6-hydroxy-1,3,3-trimethyl-2-oxo-cyclohexanecarboxylate (**9**) via Method A

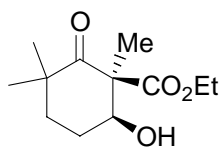

The reaction was performed according to **method A** with 50 mg (0.25 mmol) **5** using 0.6 mg (0.9 mol %) Rh(CO)<sub>2</sub>(acac) and 3 mg (1.8 mol %) XANTPHOS in 10 mL CH<sub>2</sub>Cl<sub>2</sub> at 60 bar (30:30) CO/H<sub>2</sub> and temperature of 80 °C for 18 h. Buffered oxidative workup as described above resulted in 47 mg (0.205 mmol) of **9** as a 2.5:1 mixture of diastereoisomers in 82 % yield as a viscous, pale-yellow oil requiring no further purification. **<sup>1</sup>H-NMR** (400 MHz, CDCl<sub>3</sub>) Major diastereoisomer: δ 1.14 (m, 3H, CH<sub>3</sub>C<sub>q</sub>CH<sub>3</sub>); 1.20 (t, *J* = 8 Hz, 3H,

RCO<sub>2</sub>CH<sub>2</sub>CH<sub>3</sub>); 1.24 (m, 3H, CH<sub>3</sub>C<sub>q</sub>CH<sub>3</sub>); 1.27 (s, 3H, α-CH<sub>3</sub>); 1.61-1.69 (m, 3H, C<sub>q</sub>CH<sub>2</sub>CH<sub>eq</sub>H<sub>ax</sub>R); 1.87 (m, 1H, C<sub>q</sub>CH<sub>2</sub>CH<sub>eq</sub>H<sub>ax</sub>R); 3.58 (t, *J* = 6 Hz, 1H, CH<sub>2</sub>RC(H)(OH)R); 4.10 (q, *J* = 8 Hz, 2H, RCO<sub>2</sub>CH<sub>2</sub>CH<sub>3</sub>). Minor diastereoisomer: δ 1.29 (s, 3H, α-CH<sub>3</sub>); 3.95 (q, *J* = 8 Hz, 2H, RCO<sub>2</sub>CH<sub>2</sub>CH<sub>3</sub>). <sup>13</sup>C-NMR (100 MHz, CDCl<sub>3</sub>) Major diastereoisomer: δ 13.9 (α-CH<sub>3</sub>), 14.8 (RCO<sub>2</sub>CH<sub>2</sub>Me), 24.02 (Gem-CH<sub>3</sub>), 24.05 (Gem-CH<sub>3</sub>), 25.4 (CH<sub>2</sub>), 27.7 (CH<sub>2</sub>), 48.4 (Me<sub>2</sub>-C<sub>q</sub>), 61.1 (CO<sub>2</sub>CH<sub>2</sub>CH<sub>3</sub>), 62.8 (α-C<sub>q</sub>), 70.3 (R<sub>2</sub>CHOH), 170.6 (RCO<sub>2</sub>Et), 211.3 (C=O). Minor diastereoisomer: δ 14.7 (CH<sub>3</sub>), 61.3 (RCO<sub>2</sub>CH<sub>2</sub>Me), 170.5 (CO<sub>2</sub>Et). FTIR (neat): 3364 (broad), 2932, 2856, 1758, 1685, 1239, 1023. HR-FABMS anal. calc. for C<sub>12</sub>H<sub>19</sub>O<sub>4</sub> [M - H]<sup>+</sup>: 227.1283; anal. found: 227.1259

### Methyl 2-hydroxy-1-methyl-7-oxo-cycloheptanecarboxylate (**10**) via Method A

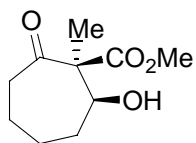

The reaction was performed according to **method A** with 232 mg (1.37 mmol) **6** using 3 mg (0.9 mol %) Rh(CO)<sub>2</sub>(acac) catalyst and 15 mg (1.8 mol %) XANTPHOS, with the autoclave being subjected to a pressure of 60 bar (30:30) CO/H<sub>2</sub> and temperature of 80 °C for 18 h. Buffered oxidative workup as described above resulted in an 89 % yield of **10** (243 mg, 1.2 mmol) as a fragrant clear-yellow oil requiring no further purification in a 6:1 ratio of diastereoisomers. <sup>1</sup>H-NMR (400 MHz, CDCl<sub>3</sub>) Major diastereoisomer: δ 1.35 (s, 3H, α-CH<sub>3</sub>); 1.80 (dq, *J* = 4, 12 Hz, 2H, R(O)CCH<sub>2</sub>C(H<sub>2</sub>)R); 2.09 (m, 1H, RH<sub>2</sub>CCH<sub>2</sub>CHHCH(OH)R); 2.37 (m, 3H, RH<sub>2</sub>CCH<sub>2</sub>CHHCH(OH)R); 2.55 (dt, *J* = 4, 12 Hz, 2H, R(O)CC(H<sub>2</sub>)CH<sub>2</sub>R); 3.69 (s, 3H, RCO<sub>2</sub>CH<sub>3</sub>); 4.15 (m, 1H, RC(H)(OH)R). Minor diastereoisomer: δ 1.47 (s, 3H, α-CH<sub>3</sub>); 3.71 (s, 3H, RCO<sub>2</sub>CH<sub>3</sub>). <sup>13</sup>C-NMR (100 MHz, CDCl<sub>3</sub>) Major diastereoisomer: δ 17.6 (α-CH<sub>3</sub>), 25.4 (CH<sub>2</sub>), 27.6 (CH<sub>2</sub>), 35.4 (CH<sub>2</sub>), 39.5 (CH<sub>2</sub>), 52.5 (CO<sub>2</sub>Me), 61.2 (C<sub>q</sub>), 78.9 (R<sub>2</sub>CHOH), 172.8 (CO<sub>2</sub>Me),

207.1 (C=O). Minor diastereoisomer:  $\delta$  17.8 ( $\alpha$ -CH<sub>3</sub>), 52.6 (CO<sub>2</sub>Me). **FTIR** (CDCl<sub>3</sub> film): 3500 (broad), 2935, 1712, 1453, 1255, 910, 733. **HR-FABMS** anal. calc. for C<sub>10</sub>H<sub>17</sub>O<sub>4</sub> [M + H]<sup>+</sup>: 201.1127; anal. found: 201.1112



26 Jan 2004  
F:\KEMIA\NMR\MK-419\10\001.ESP

### Spectrum's Parameters

Acquisition Time (sec) 3.984589  
Comment Imported from WinNmr  
Date 05/08/2003 11:24:54  
Frequency (MHz) 400.130005  
Nucleus <sup>1</sup>H  
Number of Transients 16  
Original Points Count 16384  
Points Count 32768  
Solvent CDCl<sub>3</sub>  
Sweep Width (Hz) 8223.684570  
Temperature (grad C) 27.000000

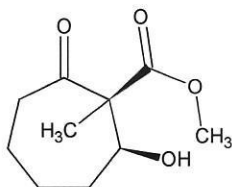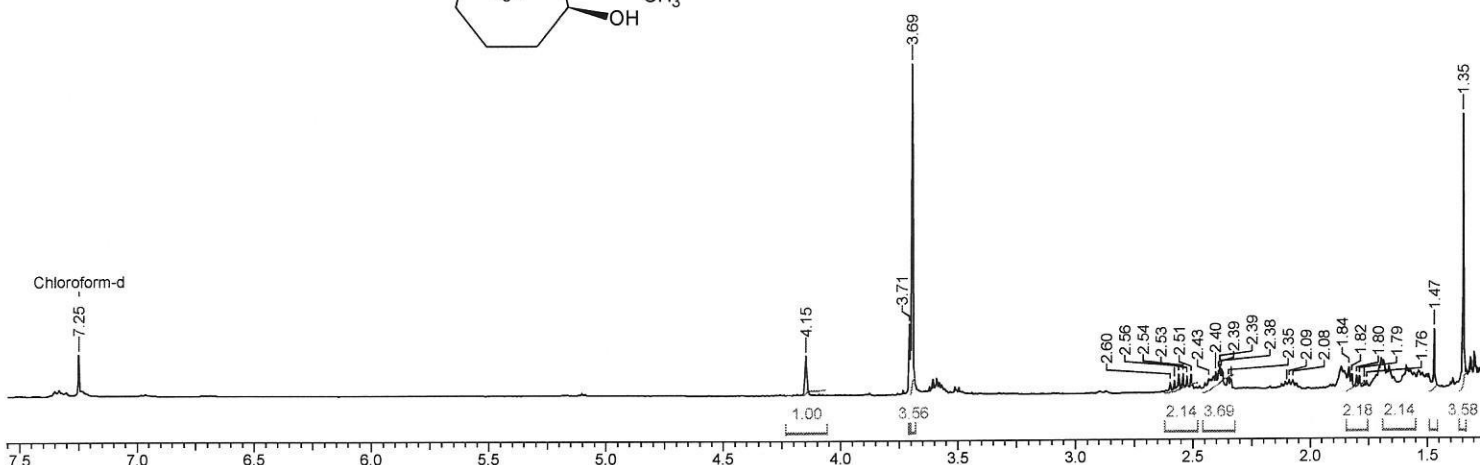

| No. | (ppm) | Height |
|-----|-------|--------|-----|-------|--------|-----|-------|--------|-----|-------|--------|
| 1   | 1.35  | 0.840  | 9   | 2.08  | 0.037  | 17  | 2.39  | 0.066  | 25  | 2.60  | 0.031  |
| 2   | 1.47  | 0.189  | 10  | 2.09  | 0.039  | 18  | 2.40  | 0.062  | 26  | 3.69  | 1.000  |
| 3   | 1.76  | 0.033  | 11  | 2.10  | 0.026  | 19  | 2.43  | 0.042  | 27  | 3.71  | 0.213  |
| 4   | 1.77  | 0.032  | 12  | 2.34  | 0.039  | 20  | 2.51  | 0.054  | 28  | 4.15  | 0.117  |
| 5   | 1.79  | 0.048  | 13  | 2.35  | 0.043  | 21  | 2.53  | 0.051  | 29  | 7.25  | 0.125  |
| 6   | 1.80  | 0.048  | 14  | 2.37  | 0.062  | 22  | 2.54  | 0.058  |     |       |        |
| 7   | 1.82  | 0.053  | 15  | 2.38  | 0.071  | 23  | 2.56  | 0.055  |     |       |        |
| 8   | 1.84  | 0.075  | 16  | 2.39  | 0.085  | 24  | 2.58  | 0.037  |     |       |        |

  

| No. | Annotation   | (ppm) |
|-----|--------------|-------|
| 1   | Chloroform-d | 7.25  |

26 Jan 2004F:\KEMIA\NMR\MK-419\11\001.ESP

### Spectrum's Parameters

Acquisition Time (sec) 1.028915  
Comment Imported from WinNmr  
Date 05/08/2003 11:18:20  
Frequency (MHz) 100.612762  
Nucleus <sup>13</sup>C  
Number of Transients 320  
Original Points Count 32768  
Points Count 32768  
Solvent CDCl<sub>3</sub>  
Sweep Width (Hz) 31847.132813  
Temperature (grad C) 27.000000

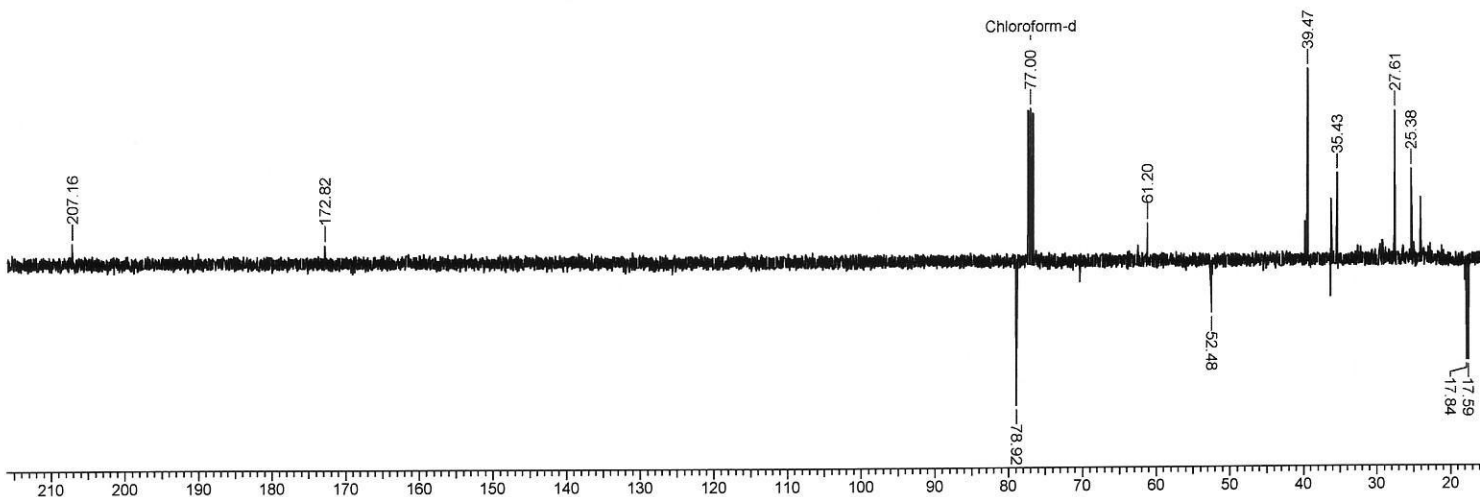

| No. | (ppm) | Height | No. | (ppm)  | Height | No. | Annotation   | (ppm) |
|-----|-------|--------|-----|--------|--------|-----|--------------|-------|
| 1   | 0.96  | -0.330 | 8   | 52.48  | -0.278 | 1   | Chloroform-d | 77.00 |
| 2   | 17.59 | -0.533 | 9   | 61.20  | 0.189  |     |              |       |
| 3   | 17.84 | -0.532 | 10  | 77.00  | 0.795  |     |              |       |
| 4   | 25.38 | 0.465  | 11  | 78.92  | -0.769 |     |              |       |
| 5   | 27.61 | 0.774  | 12  | 172.82 | 0.096  |     |              |       |
| 6   | 35.43 | 0.446  | 13  | 207.16 | 0.109  |     |              |       |
| 7   | 39.47 | 1.000  |     |        |        |     |              |       |

STANDARD PROTON PARAMETERS

Archive directory: /export/home/vnmr1/vnmrSYS/data  
Sample directory: vnmr1\_20Jan2004  
File: NOESY1D\_4\_11p

Pulse Sequence: NOESY1D

Solvent: CDCl3  
Temp. 27.0 C / 300.1 K  
INOVA-600 "eden"

Relax. delay 1.000 sec  
Pulse 90.0 degrees  
Mixing 0.800 sec  
Acq. time 1.891 sec  
Width 6000.6 Hz  
64 repetitions

OBSERVE H1, 599.8311865 MHz  
DATA PROCESSING  
Line broadening 1.0 Hz  
FT size 32768  
Total time 4 min, 52 sec

6:1 mixture of diastereoisomers

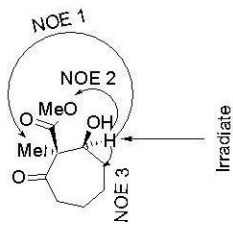

NOE 1

NOE 3

NOE 2

S10

ppm

1.5

2.0

2.5

3.0

3.5

4.0

MK419-noe1\_20Jan2004

Archive directory: /export/home/vnmr1/vnmrSYS/data  
Sample directory: MK419-noe1\_20Jan2004  
File: NOESY1D\_1\_30p

Pulse Sequence: NOESY1D

Solvent: CDCl3  
Temp. 27.0 C / 300.1 K  
INOVIA-600 "eden"

Relax. delay 1.000 sec  
Pulse 90.0 degrees  
Mixing 0.800 sec  
Acq. time 1.888 sec  
Width 6000.6 Hz  
64 repetitions

OBSERVE HI, 599.8311865 MHz  
DATA PROCESSING  
Line broadening 1.0 Hz  
FT size 32768  
Total time 4 min, 37 sec

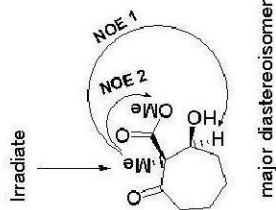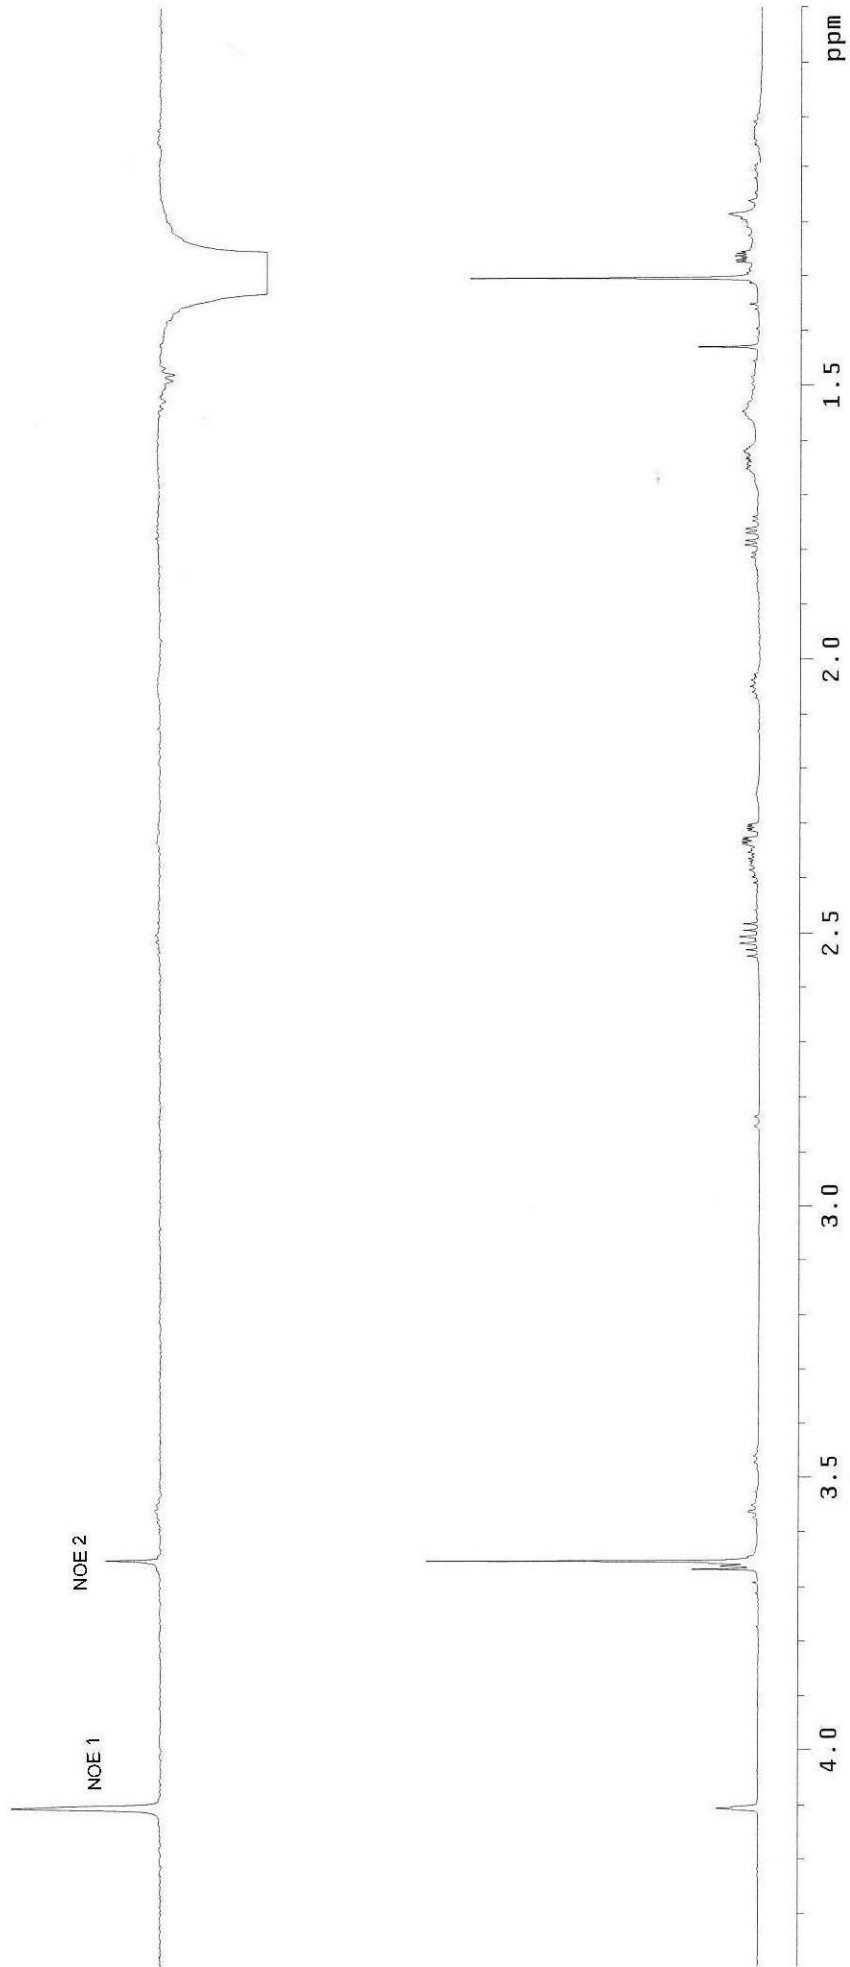

MK419-noe2\_20Jan2004

Archive directory: /export/home/vnmr1/vnmrSYS/data  
Sample directory: MK419-noe2\_20Jan2004  
File: NOESYID\_1\_43p

Pulse Sequence: NOESY1D  
Solvent: CDC13  
Temp: 27.0 C / 300.1 K  
INOVA-600 "eden"

Relax. delay 1.000 sec  
Pulse 90.0 degrees  
Mixing 0.800 sec  
Acq. time 1.888 sec  
width 6000.6 Hz  
64 repetitions

OBSERVE H1 599.8311865 MHz  
DATA PROCESSING  
Line broadening 1.0 Hz  
FT size 32768  
Total time 4 min, 40 sec

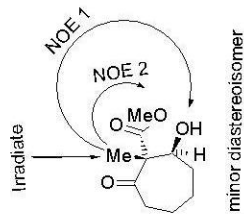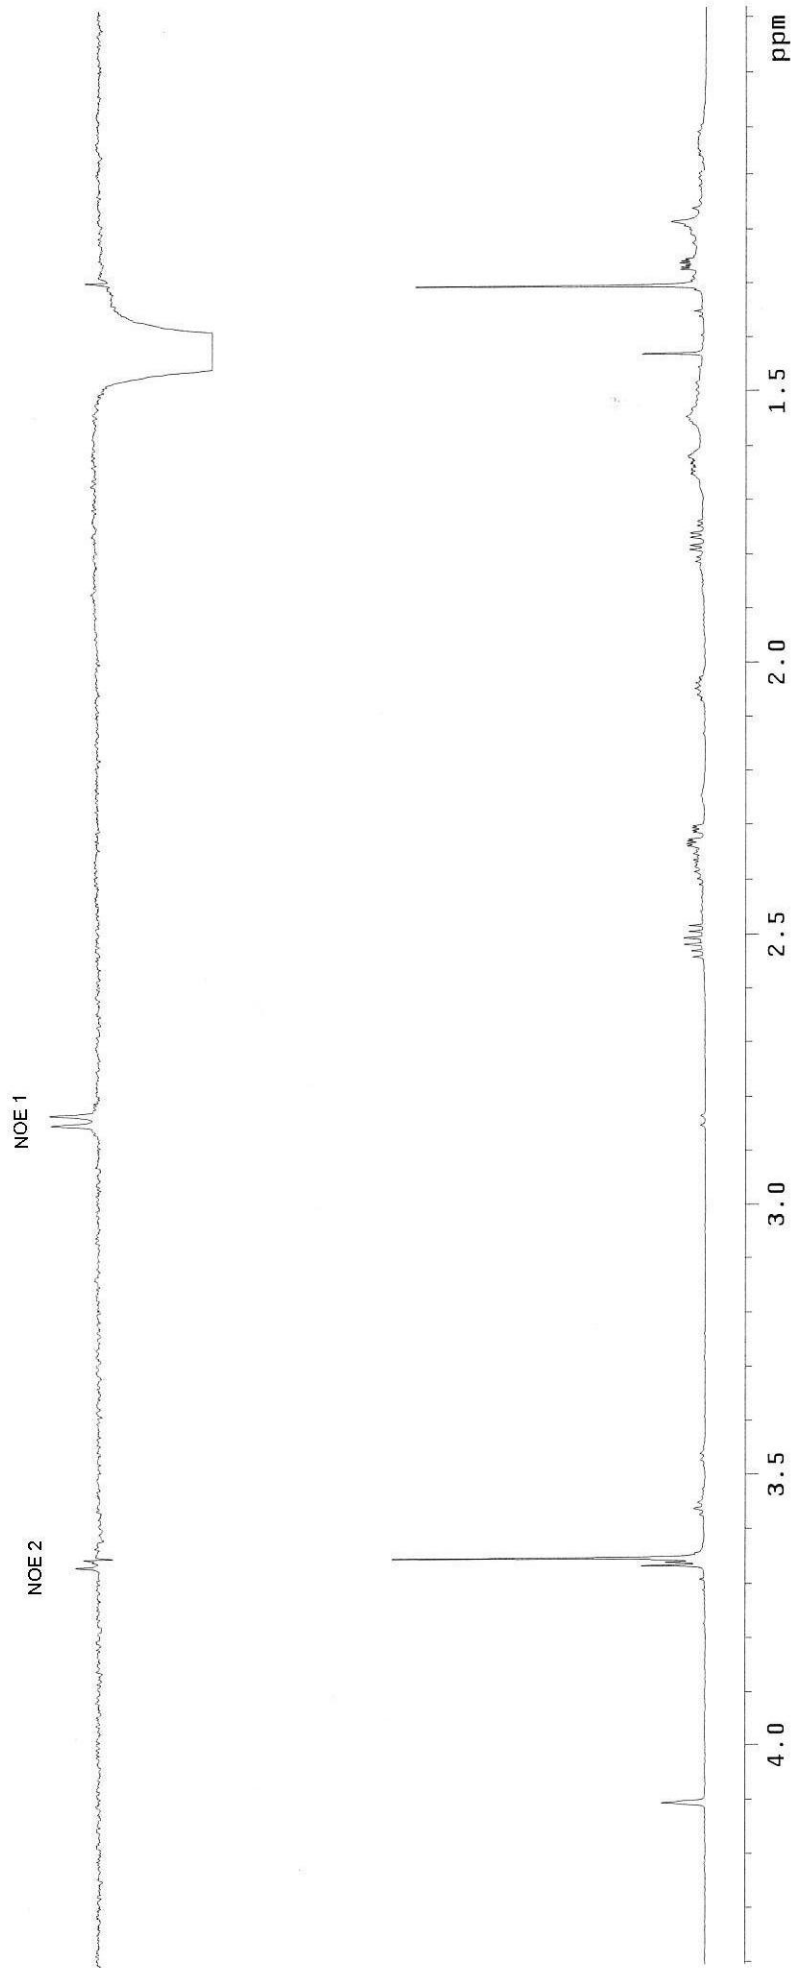

Supplement: b405120c.pdf [file b405120c.pdf]
